# Supplementary material
Source: publisher site journal article supplement (https://www.dovepress.com/article/247259)
Supplement: Supplementary file 1 [file get_supplementary_file.php]

**Supplementary Materials**

The details about blood sample collection, liquid chromatography-mass spectrometry methods, and the assessment of *CYP2D6* polymorphisms and gene dose assignment have been described previously.1

**Blood sample collection**

Whole blood venous samples were collected with and without anticoagulant (ethylenediaminetretracetic acid (EDTA)). EDTA samples were immediately stored at -30 degree Celsius (°C) until deoxyribonucleic acid (DNA) extraction. Serum samples were immediately stored at 4°C and centrifuged for 9 minutes at 2300 g and 4°C within 60 minutes after collection. Serum was removed and stored at -20°C. To avoid further freeze and thaw cycles serum samples were thawed once and stored in aliquots (1.5 ml reaction tubes).

**Liquid chromatography-mass spectrometry methods**

The method was optimized starting from the method described by Noetzli et al 2012.2 Validation was carried out according to the guideline C62-A for Liquid Chromatography-Mass Spectrometry Methods.3

A triple quadrupole mass spectrometer (QTRAP 5500, SCIEX, USA) with a high-performance liquid chromatography (HPLC) system (1260, G1367E; Agilent Technologies Deutschland GmbH, Germany) was used to analyze the samples in SRM mode (selected reaction monitoring mode). For the quantification of donepezil mass transition 381->91.1(Da) was selected and 383.5 -> 91.0 (Da) for IS (donepezil 13C3). Transiton 251.1->58.0 (Da) combined with 257.1 ->206.1 (Da) (rivastigmine D6) was used for rivastigmine quantification. For data analysis Analyst 1.6 (SCIEX Pte.Ltd, Singapore) was applied.

A seven point calibration curve was prepared (0.5 ng/ml to 33 ng/ml for rivastigmine and 0.5 ng/ml to 66 ng/ml for donepezil) using drug free serum. In addition, three independent quality control samples with concentrations covering the calibration ranges were prepared.

For sample preparation 50 µl serum was mixed with 200 µl precipitation agent for 15 seconds at 1000 rpm. The precipitation agent (acetonitrile/methanol 30/70(v/v)) contained internal standards (IS): 10 ng/ml rivastigmine D6 (Toronto Research Chemicals (TRC), Toronto, Ontario) and donepezil 13C3 50 ng/ml (TRC, Toronto Ontario). The mixed sample was centrifuged at 1000 x g for 10 minutes. Either 10 µl or 50 µl of the supernatant were injected into the LC-MS system to analyze donepezil and rivastigmine, respectively. Chromatographic separation was carried out using a gradient on a reversed phase C18 column (Onyx Monolithic C18, 100 x 3.0 mm, Phenomenex Germany, Germany) at 45°C. Mobile phase A was of H2O, mobile phase B was methanol, each buffered with 0.1 % acetic acid (v/v) and 12.5 mM ammonium acetate. All solvents were LC-MS grade. Total run time was 7 minutes.

Patient samples above the highest calibration concentration were diluted with drug free serum. All samples were measured at least in duplicate and mean was used for further analyses.

**Assessment of *CYP2D6* polymorphisms and gene dose assignment**

DNA was isolated by standard procedures from 300 µl EDTA anticoagulated blood according to the manufacturer’s instructions (Wizard Genomic DNA Purification Kit, Promega). The isolated DNA of the *CYP2D6* gene was immediately preamplified according to local SOPs. Considering the prevalence of *CYP2D6* polymorphisms in Caucasians, the following alleles were assessed: **1* (wildtype), **3, *4, *5, *6* (no enzyme activity), **9, *10, *41* (reduced enzyme activity), and duplications of *1 (increased enzyme activity). Genotyping for all polymorphisms of interest was performed according to methods previously described using real-time quantitative polymerase chain reaction (PCR)4-6 on a LightCycler 2.0 (Roche, Mannheim) with LightCycler Carousel Centrifuge (Roche, Mannheim). Following previously published methods7-9 allele specific PCR was performed using GeneAmp PCR Systems 9700 (PE Applied Biosystems, Weiterstadt) for *CYP2D6*3*, *CYP2D6***4*, *CYP2D6*5*, *CYP2D6*6* and *CYP2D6*10*. Supplementary Table 1 shows assessed polymorphisms and used methods of assessment.

Defective alleles were assigned a gene dose of 0, alleles resulting in a reduced enzyme activity were assigned a gene dose of 0.5, wild type allele **1* a gene dose of 1, and duplications of a wild type allele a gene dose of at least 2 (Supplementary Table 2).

**References:**

# Ortner M, Stange M, Schneider H, Schroeder C, Buerger K, Müller C, et al. Serum Concentrations of Cholinesterase Inhibitors in Patients With Alzheimer's Dementia Are Frequently Below the Recommended Levels. Front Pharmacol. 2020;11:691. doi:10.3389/fphar.2020.00691

# Noetzli M, Ansermot N, Dobrinas M, Eap CB. Simultaneous determination of antidementia drugs in human plasma: procedure transfer from HPLC-MS to UPLC-MS/MS. J Pharm Biomed Anal. 2012;64-65:16–25. doi:10.1016/j.jpba.2012.02.008.

# Clarke W, Molinaro RJ. Liquid chromatography-mass spectrometry methods: Approved guideline. Wayne, Penn.: Clinical and Laboratory Standards Institute; 2014.

# Raimundo S, Toscano C, Klein K, Fischer J, Griese E-U, Eichelbaum M, et al. A novel intronic mutation, 2988GA, with high predictivity for impaired function of cytochrome P450 2D6 in white subjects. Clin Pharmacol Ther. 2004;76:128–38. doi:10.1016/j.clpt.2004.04.009.

# Müller B, Zöpf K, Bachofer J, Steimer W. Optimized strategy for rapid cytochrome P450 2D6 genotyping by real-time long PCR. Clin Chem. 2003;49:1624–31.

# Stamer UM, Bayerer B, Wolf S, Hoeft A, Stüber F. Rapid and reliable method for cytochrome P450 2D6 genotyping. Clin Chem. 2002;48:1412–7.

# Ji L, Pan S, Marti-Jaun J, Hänseler E, Rentsch K, Hersberger M. Single-step assays to analyze CYP2D6 gene polymorphisms in Asians: Allele frequencies and a novel *14B allele in mainland Chinese. Clin Chem. 2002;48:983–8.

# Sachse C, Brockmöller J, Bauer S, Roots I. Cytochrome P450 2D6 variants in a Caucasian population: Allele frequencies and phenotypic consequences. Am J Hum Genet. 1997;60:284–95.

# Løvlie R, Daly AK, Molven A, Idle JR, Steen VM. Ultrarapid metabolizers of debrisoquine: Characterization and PCR-based detection of alleles with duplication of the CYP2D6 gene. FEBS Lett. 1996;392:30–4.

**Supplementary Tables**

**Supplementary Table 1: Gene dose, allele mutations and type of metabolizer**

| Gene dose | Mutation of alleles | Type of metabolizer | Participants [n] |
| --- | --- | --- | --- |
| 0 | 2 deficient alleles | PM | 2 |
| 0.5 | 1 deficient allele +  1 reduced allele | IM | 8 |
| 1 | 2 reduced alleles/  1 deficient allele + 1 wt | EM | 19 |
| 1.5 | 1 wt + 1 reduced allele | EM | 6 |
| 2 | 2 x wt | EM | 11 |
| ≥ 3 | duplication | UM | 1 |

**Abbreviations:** n, number of participants; wt, wild type; PM, poor metabolizer; IM, intermediate metabolizer; EM, extensive metabolizer; UM, ultra-rapid metabolizer

**Supplementary Table 2: Overview of polymorphisms and applied measuring methods**

| Polymorphism | SOP Thermocycler | SOP LightCycler |
| --- | --- | --- |
| Deletion (*5)/Duplikation | C2D6 Del-Dup-P PCR Del-Dup | C2D6 Del-Dup LC |
| *3 | C2D6 multiplex-P PCR multiplex | C2D6 multiplexB-S probe multiplexB |
| *4, *6 | C2D6 multiplex-P PCR multiplex | C2D6 multiplexA-S probe multiplexA |
| *9 | - | C2D6 9-S probe-9 |
| *10 | C2D6 10-P PCR-10 | C2D6 10-S probe-10 |
| *41 | - | C2D6 41-S probe-41 |

**Abbreviations:** SOP, standard operating procedure; C2D6, Cytochrome P450 isoenzyme 2D6; Del, deletion; Dup, duplication; PCR, Polymerase Chain Reaction.

**Supplementary Table 3: Single alleles and corresponding gene dose**

| Allele | *1 | *3 | *4 | *5 (Del) | *6 | *9 | *10 | *41 | Duplication |
| --- | --- | --- | --- | --- | --- | --- | --- | --- | --- |
| Single gene dose | 1 | 0 | 0 | 0 | 0 | 0.5 | 0.5 | 0.5 | >2 |

**Abbreviations:** Del, deletion.

**Supplementary Table 4: Baseline results of CERAD-NAB**

|  | n= | Donepezil | n= | Rivastigmine | p-value |
| --- | --- | --- | --- | --- | --- |
| Verbal fluency | 47 | 13.7 ± 6.81 (1-28) | 28 | 13.4 ± 6.30 (2-25) | 0.784 |
| Boston Naming Test | 47 | 11.8 ± 2.53 (4-15) | 28 | 11.6 ± 2.96 (5-15) | 0.943 |
| MMSE | 48 | 23.2 ± 3.54 (14-29) | 28 | 22.4 ± 5.10 (11-29) | 0.892 |
| Wordlist memory | 47 | 11.9 ± 4.71 (0-21) | 27 | 11.0 ± 4.19 (3-18) | 0.431 |
| Constructional practice | 47 | 8.9 ± 2.26 (2-11) | 27 | 9.1 ± 2.1 (4-11) | 0.690 |
| Wordlist recall | 47 | 2.0 ± 1.81 (0-7) | 27 | 2.3 ± 2.05 (0-7) | 0.517 |
| Wordlist recognition | 47 | 81.8 ± 10.96 (55-100) | 27 | 80.0 ± 14.21 (50-100) | 0.708 |
| Constructional recall | 47 | 3.7 ± 2.95 (0-11) | 27 | 3.7 ± 3.38 (0-11) | 0.865 |
| CERAD total Score | 47 | 52.3 ± 13.44 (22-80) | 27 | 51.5 ± 13.82 (26-76) | 0.840 |
| Clock completion | 43 | 3.1±1.17 (1-5) | 21 | 3.3±1.52 (1-6) | 0.917 |

**Notes:** Where applicable, mean ± standard deviation (minimum - maximum); p-value calculated from Mann-Whitney U test.

**Abbreviations:** CERAD-NAB, Consortium to Establish a Registry for Alzheimer`s Disease Neuropsychological Assessment Battery; n, number of available subgroup test results. MMSE, Mini-Mental State Examination.

**Supplementary Table 5: Sex differences *rivastigmine***

|  | male | female | p-value |
| --- | --- | --- | --- |
| Serum concentration rivastigmine in ng/ml | 6.6 ± 5.28 (1.85-17.50) | 5.7 ± 5.02 (0.47-16.90) | 0.698 |
| Serum concentration on daily dose of 9.5mg | 6.6 ± 5.28 (1.85-17.50) | 6.39 ± 5.19 (0.47-16.90) | 1.0 |
| Body weight (in kg) | 74.1 ± 12.07 (50-90) | 60.2 ± 11.53 (47-80) | 0.012 |
| BMI | 24.6 ± 2.59 (19.50-27.80) | 22.5 ± 4.92 (16.50-30.90) | 0.144 |

**Notes:** Serum concentration and BMI of male and female participants, respectively, in the *rivastigmine* group. Where applicable, mean ± standard deviation (minimum - maximum). p-value calculated from Mann-Whitney-U-test.

**Abbreviations:** ng, nanogram; ml, milliliter; mg, milligram; kg, participants’ weight in kilogram; BMI, body mass index.

**Supplementary Table 6: CYP2D6 polymorphism**

| Allele | *1 | *1 x2 | *3 | *4 | *4 x2 | *5 (Del) | *6 | *9 | *10 | *41 | Duplication *1 |
| --- | --- | --- | --- | --- | --- | --- | --- | --- | --- | --- | --- |
| Single gene dose | 1 | 2 | 0 | 0 | 0 | 0 | 0 | 0.5 | 0.5 | 0.5 | 2 |
| Number | 37 | 11 | 1 | 24 | 1 | 4 | 1 | 1 | 2 | 11 | 1 |
| Allele frequency | 0.387 | 0.118 | 0.011 | 0.258 | 0.011 | 0.043 | 0.011 | 0.011 | 0.021 | 0.118 | 0.011 |

**Notes:** Overview of tested alleles, corresponding gene dose, absolute number and frequency of alleles.

Abbreviations: Del, Deletion

**Supplementary Table 7: Gene dose distribution**

| Gene dose | 0 | 0.5 | 1 | 1.5 | 2 | 3 |
| --- | --- | --- | --- | --- | --- | --- |
| Type of metabolizer | PM | IM | EM | EM | EM | UM |
| Number | 2 | 8 | 19 | 6 | 11 | 1 |
| Donepezil serum concentration [ng/ml] | 50.28±7.11 (45.25-55.30) | 47.96±19.55 (27.10-87.55) | 36.49±15.7 (14.85-60.15) | 43.61±22.83 (17.90-81.05) | 34.71±9.65 (21.75-48.35) | 12.95 |

**Notes:** Gene dose, type of metabolizer and their respective number within the donepezil group.

Abbreviations: PM, poor metabolizer; IM, intermediate metabolizer; EM, extensive metabolizer; UM, ultra-rapid metabolizer

**Supplementary Table 8: Prediction of serum concentration of *donepezil* *univariate* regression analyses**

|  | Gene dose | Daily dose | CYP 2D6-  Inhibitors | Age | Sex | Duration AChE-I intake | Time since last dosing |
| --- | --- | --- | --- | --- | --- | --- | --- |
| corr. R² | 0.030 | 0.209 | 0.058 | -0.009 | 0.095 | -0.021 | -0.007 |
| Beta | -0.226 | 0.475 | 0.279 | 0.113 | -0.338 | 0.31 | 0.122 |
| p-value | 0.131 | 0.001 | 0.055 | 0.443 | 0.019 | 0.832 | 0.409 |

**Abbreviations:** AChE-I, acetylcholinesterase inhibitor; corr. R², corrected R²

**Supplementary Table 9: Prediction of serum concentration of *donepezil using type of metabolizer***

|  | Beta | p-value |
| --- | --- | --- |
| Type of metabolizer | -0.311 | 0.013 |
| Daily dose | 0.385 | 0.002 |
| CYP2D6-Inhibitors | 0.246 | 0.033 |
| Age | 0.144 | 0.203 |
| Sex | -0.511 | <0.001 |
| Duration of AChE-I treatment | 0.217 | 0.079 |
| Time since last dosing | 0.040 | 0.733 |

**Notes:** Prediction of serum concentration of *donepezil using type of metabolizer instead of gene dose. Multivariate* regression model; n=47; corrected R²=0.482, p<0.001

**Abbreviations:** AChE-I, acetylcholinesterase inhibitor.

**Supplementary Table 10: Prediction of serum concentration of *donepezil, Multivariate* regression model including body weight in kilogram**

|  | Beta | p-value |
| --- | --- | --- |
| Gene dose | -0.341 | 0.034 |
| Daily dose | 0.333 | 0.020 |
| CYP2D6-Inhibitors | 0.226 | 0.084 |
| Age | 0.170 | 0.182 |
| Sex | -0.680 | <0.001 |
| Duration AChE-I treatment | 0.367 | 0.020 |
| Body weight in kg | 0.181 | 0.248 |
| Time since last dosing | -0.059 | 0.682 |

**Notes:** Prediction of serum concentration of *donepezil, Multivariate* regression model including body weight in kilogram; n=41; corrected R²=0.439, p<0.001

**Abbreviations:** AChE-I, acetylcholinesterase inhibitor; kg, kilogram.

**Supplementary Table 11: Prediction of serum concentration of *donepezil, Multivariate* regression model including body mass index (BMI)**

|  | Beta | p-value |
| --- | --- | --- |
| Gene dose | -0.316 | 0.050 |
| Daily dose | 0.324 | 0.023 |
| CYP2D6-Inhibitors | 0.237 | 0.072 |
| Age | 0.170 | 0.183 |
| Sex | -0.568 | <0.001 |
| Duration AChE-I treatment | 0.348 | 0.025 |
| BMI | 0.130 | 0.304 |
| Time since last dosing | -0.044 | 0.755 |

**Notes:** Prediction of serum concentration of *donepezil, Multivariate* regression model including body mass index (BMI); n=41; corrected R²=0.434, p<0.001.

**Abbreviations:** AChE-I, acetylcholinesterase inhibitor; BMI, body mass index.

**Supplementary Table 12: Prediction of serum concentration of *rivastigmine, multivariate* regression model**

|  | Beta | p-value |
| --- | --- | --- |
| Daily dose | 0.256 | 0.284 |
| CYP2D6-Inhibitors | 0.190 | 0.475 |
| Age | -0.062 | 0.775 |
| Sex | 0.042 | 0.847 |
| Duration AChE-I treatment | -0.061 | 0.823 |
| Time since last dosing | 0.248 | 0.266 |

**Notes:** Prediction of serum concentration of *rivastigmine, Multivariate* regression model; corrected R² -0.112, p=0.767.

**Abbreviations:** AChE-I, acetylcholinesterase inhibitor.

**Supplementary Table 13: Prediction of serum concentration of *rivastigmine, Multivariate* regression model including body weight**

|  | Beta | p-value |
| --- | --- | --- |
| Daily dose | 0.121 | 0.646 |
| CYP2D6-Inhibitors | 0.088 | 0.773 |
| Age | -0.098 | 0.684 |
| Sex | 0.138 | 0.635 |
| Duration AChE-I treatment | 0.096 | 0.753 |
| Body weight | -0.275 | 0.351 |
| Time since last dosing | 0.431 | 0.104 |

**Notes:** Prediction of serum concentration of *rivastigmine, Multivariate* regression model including body weight; corrected R²=-0,144, p=0,772.

**Abbreviations:** AChE-I, acetylcholinesterase inhibitor.

**Supplementary Table 14: Prediction of serum concentration of *rivastigmine, multivariate* regression model including body mass index**

|  | Beta | p-value |
| --- | --- | --- |
| Daily dose | 0.060 | 0.819 |
| CYP2D6-Inhibitors | 0.148 | 0.625 |
| Age | -0.083 | 0.722 |
| Sex | 0.128 | 0.614 |
| Duration AChE-I treatment | 0.050 | 0.869 |
| BMI | -0.366 | 0.186 |
| Time since last dosing | 0.437 | 0.087 |

**Notes:** Prediction of serum concentration of *rivastigmine, multivariate* regression model including body mass index; corrected R²=-0,285, p=0,649.

**Abbreviations:** AChE-I, acetylcholinesterase inhibitor; BMI body mass index.

**Supplementary Table 15: Absolute difference of CERAD-NAB results between baseline and follow-up**

|  | n= | Donepezil | n= | Rivastigmine | p-value |
| --- | --- | --- | --- | --- | --- |
| Verbal fluency | 47 | -0.9 ± 3.75  (-11 to 7) | 28 | -1.93 ± 4.05  (-11 to 9) | 0.240 |
| Boston Naming Test | 47 | 0.0 ± 1.53  (-4 to 4) | 28 | -0.5 ± 1.86  (-4 to 5) | 0.176 |
| MMSE | 48 | 0.5 ± 3.31  (-9 to 6) | 28 | 0.0 ± 2.59  (-7 to 8) | 0.204 |
| Wordlist memory | 47 | 0.9 ± 3.23  (-7 to 10) | 26 | 0.5 ± 3.24  (-7 to 6) | 0.848 |
| Constructional practice | 47 | 0.3 ± 1.34  (-3 to 4) | 26 | 0.6 ± 1.68  (-4 to 5) | 0.394 |
| Wordlist recall | 47 | 0.5 ± 1.46  (-2 to 4) | 26 | 0.2 ± 1.42  (-2 to 3) | 0.362 |
| Wordlist recognition | 47 | 2.5 ± 10.93  (-20 to 20) | 26 | 2.9 ± 11.85  (-20 to 25) | 0.944 |
| Constructional recall | 47 | -0.5 ± 2.59  (-7 to 5) | 26 | 0.5 ± 2.3  (-5 to 5) | 0.148 |
| CERAD total Score | 47 | 0.9 ± 6.85  (-12 to 15) | 26 | -0.7 ± 6.37  (-11 to 13) | 0.258 |
| Clock completion | 43 | -0.2 ± 0.84  (-3 to 1) | 21 | 0.2 ± 1.25  (-3 to 2) | 0.125 |

**Notes:** Where applicable, mean ± standard deviation (minimum – maximum); p-value calculated from Mann-Whitney U test.

**Abbreviations:** n, number of valid test results; MMSE, Mini-Mental State examination; CERAD-NAB, Consortium to Establish a Registry for Alzheimer`s Disease Neuropsychological Assessment Battery.

**Supplementary Table 16: Correlation between cognitive changes and *donepezil* serum concentration**

|  |  | Serum concentration | Baseline test result | Time baseline to follow-up | Sex | Age | model  corr.R² | model  p-value |
| --- | --- | --- | --- | --- | --- | --- | --- | --- |
| Verbal fluency | Beta | -0.102 | -0.561 | -0.006 | 0.040 | -0.003 | 0.236 | 0.006 |
| p-value | 0.474 | <0.001 | 0.967 | 0.784 | 0.982 |
| Modified Boston Naming Test | Beta | -0.025 | -0.373 | -0.028 | 0.152 | 0.105 | 0.087 | 0.119 |
| p-value | 0.874 | 0.014 | 0.847 | 0.342 | 0.481 |
| MMSE | Beta | -0.006 | -0.213 | -0.286 | 0.069 | 0.031 | 0.035 | 0.265 |
| p-value | 0.969 | 0.164 | 0.061 | 0.665 | 0.835 |
| Word List - Total | Beta | 0.171 | -0.270 | -0.309 | 0.257 | -0.080 | 0.114 | 0.075 |
| p-value | 0.267 | 0.080 | 0.038 | 0.116 | 0.579 |
| Figures – Copy | Beta | 0.020 | -0.176 | -0.292 | 0.052 | 0.161 | 0.032 | 0.280 |
| p-value | 0.903 | 0.275 | 0.058 | 0.763 | 0.286 |
| Word List – Delayed Recall | Beta | 0.029 | -0.501 | -0.145 | 0.108 | -0.127 | 0.242 | 0.005 |
| p-value | 0.843 | 0.001 | 0.301 | 0.464 | 0.340 |
| Word List – Recognition | Beta | -0.076 | -0.463 | 0.255 | 0.083 | -0.030 | 0.145 | 0.041 |
| p-value | 0.621 | 0.003 | 0.075 | 0.597 | 0.830 |
| Figures – Recall | Beta | -0.240 | -0.431 | 0.131 | 0.186 | 0.076 | 0.090 | 0.113 |
| p-value | 0.132 | 0.012 | 0.380 | 0.273 | 0.603 |
| CERAD Total Score | Beta | 0.018 | -0.325 | -0.121 | 0.196 | 0.006 | 0.016 | 0.351 |
| p-value | 0.913 | 0.039 | 0.425 | 0.247 | 0.967 |
| Clock Drawing | Beta | 0.301 | -0.116 | -0.413 | -0.067 | -0.080 | 0.168 | 0.036 |
| p-value | 0.060 | 0.469 | 0.009 | 0.695 | 0.587 |

**Notes:** *Multivariate* regression analyses between changes in cognitive tests and *donepezil* serum concentration, baseline test result, time from baseline to follow-up, sex, and age.

**Abbreviations:** MMSE, Mini-Mental State examination; CERAD-NAB, Consortium to Establish a Registry for Alzheimer`s Disease Neuropsychological Assessment Battery.

**Supplementary Table 17: Correlation between cognitive changes and *rivastigmine* serum concentration**

|  |  | Serum concentration | Baseline test result | Time baseline to follow-up | Sex | Age | model  corr.R² | model  p-value |
| --- | --- | --- | --- | --- | --- | --- | --- | --- |
| Verbal fluency | Beta | 0.259 | -0.608 | -0.007 | 0.067 | -0.404 | 0.275 | 0.031 |
| p-value | 0.149 | 0.004 | 0.967 | 0.697 | 0.028 |
| Modified Boston Naming Test | Beta | -0.102 | -0.439 | -0.159 | 0.121 | 0.004 | 0.076 | 0.249 |
| p-value | 0.602 | 0.049 | 0.403 | 0.534 | 0.985 |
| MMSE | Beta | 0.059 | 0.112 | -0.100 | 0.177 | 0.154 | -0.141 | 0.888 |
| p-value | 0.789 | 0.642 | 0.642 | 0.413 | 0.492 |
| Word List - Total | Beta | 0.111 | -0.321 | -0.038 | 0.084 | 0.013 | -0.099 | 0.737 |
| p-Value | 0.619 | 0.180 | 0.868 | 0.705 | 0.953 |
| Figures – Copy | Beta | -0.105 | -0.526 | -0.090 | 0.088 | -0.192 | 0.174 | 0.115 |
| p-value | 0.573 | 0.010 | 0.630 | 0.650 | 0.315 |
| Word List – Delayed Recall | Beta | 0.465 | -0.655 | 0.276 | 0.228 | -0.183 | 0.269 | 0.043 |
| p-value | 0.018 | 0.004 | 0.153 | 0.224 | 0.317 |
| Word List – Recognition | Beta | 0.235 | -0.828 | 0.150 | 0.063 | -0.348 | 0.357 | 0.014 |
| p-value | 0.172 | <0.001 | 0.411 | 0.713 | 0.067 |
| Figures – Recall | Beta | 0.347 | -0.476 | 0.060 | 0.273 | -0.151 | 0.058 | 0.299 |
| p-value | 0.102 | 0.051 | 0.764 | 0.203 | 0.492 |
| CERAD Total Score | Beta | 0.128 | -0.436 | -0.187 | 0.090 | -0.265 | 0.111 | 0.199 |
| p-value | 0.530 | 0.067 | 0.381 | 0.658 | 0.199 |
| Clock Drawing | Beta | -0.184 | -0.520 | -0.124 | -0.244 | 0.294 | 0.308 | 0.057 |
| p-value | 0.343 | 0.018 | 0.538 | 0.246 | 0.162 |

**Notes:** *Multivariate* regression analysis between changes in cognitive tests and *rivastigmine* serum concentration, baseline test result, time from baseline to follow-up, sex, and age.

**Abbreviations:** MMSE, Mini-Mental State examination; CERAD-NAB, Consortium to Establish a Registry for Alzheimer`s Disease Neuropsychological Assessment Battery.

**Supplementary Table 18: *Univariate* linear regression analyses of changes in cognitive tests for the donepezil group**

|  |  | Serum concentration donepezil | Baseline test result | Time baseline to follow up | Sex | Age |
| --- | --- | --- | --- | --- | --- | --- |
| Verbal fluency | corr. R² | -0.016 | 0.288 | -0.02 | -0.02 | -0.02 |
| p-value | 0.604 | <0.001 | 0.753 | 0.757 | 0.781 |
| Beta | -0.078 | -0.551 | 0.047 | 0.046 | 0.042 |
| Modified Boston Naming Test | corr. R² | -0.014 | 0.129 | -0.022 | -0.002 | 0.012 |
| p-value | 0.557 | 0.008 | 0.866 | 0.348 | 0.216 |
| Beta | -0.088 | -0.384 | -0.025 | 0.140 | 0.184 |
| MMSE | corr. R² | -0.022 | 0.039 | 0.076 | -0.021 | -0.021 |
| p-value | 0.977 | 0.094 | 0.033 | 0.865 | 0.883 |
| Beta | 0.111 | -0.285 | -0.320 | 0.033 | -0.089 |
| Word List – total | corr. R² | -0.01 | 0.061 | 0.083 | -0.021 | -0.014 |
| p-value | 0.459 | 0.052 | 0.028 | 0.828 | 0.551 |
| Beta | 0.111 | -0.285 | -0.320 | 0.033 | -0.089 |
| Figures – Copy | corr. R² | -0.021 | 0.014 | 0.07 | -0.019 | -0.007 |
| p-value | 0.848 | 0.202 | 0.041 | 0.689 | 0.421 |
| Beta | 0.029 | -0.189 | -0.300 | -0.060 | 0.120 |
| Word List – Delayed Recall | corr. R² | -0.012 | 0.269 | 0.071 | -0.01 | 0.010 |
| p-value | 0.502 | <0.001 | 0.039 | 0.457 | 0.234 |
| Beta | 0.100 | -0.534 | -0.302 | -0.111 | -0.177 |
| Word List – Recognition | corr. R² | -0.021 | 0.135 | 0.03 | -0.022 | -0.022 |
| p-value | 0.822 | 0.006 | 0.126 | 0.922 | 0.905 |
| Beta | 0.034 | -0.392 | 0.226 | 0.015 | -0.018 |
| Figures – Recall | corr. R² | 0.006 | 0.042 | -0.018 | -0.007 | -0.005 |
| p-value | 0.261 | 0.088 | 0.687 | 0.418 | 0.383 |
| Beta | -0.167 | -0.252 | 0.060 | 0.121 | 0.130 |
| Clock drawing | corr. R² | 0.03 | -0.019 | 0.146 | 0.021 | -0.018 |
| p-value | 0.138 | 0.641 | 0.007 | 0.178 | 0 608 |
| Beta | 0.230 | -0.073 | -0.408 | -0.209 | -0 080 |
| CERAD-total score | corr. R² | -0.22 | 0.062 | -0.009 | -0.015 | -0.022 |
| p-value | 0.949 | 0.050 | 0.450 | 0.587 | 0.886 |
| Beta | -0.010 | -0.287 | -0.113 | 0.081 | 0.021 |

**Abbreviations:** MMSE, Mini-Mental State examination; CERAD-NAB, Consortium to Establish a Registry for Alzheimer`s Disease Neuropsychological Assessment Battery.

**Supplementary Table 19: *Univariate* linear regression analyses of changes in cognitive tests for the rivastigmine group**

|  |  | Serum concentration rivastigmine | Baseline test result | Time baseline to follow up | Sex | Age |
| --- | --- | --- | --- | --- | --- | --- |
| Verbal fluency | corr. R² | -0.023 | 0.146 | 0.007 | -0.036 | 0.047 |
| p-value | 0.536 | 0.026 | 0.285 | 0.793 | 0.138 |
| Beta | 0.122 | -0.421 | -0.209 | 0.052 | -0.287 |
| Modified Boston Naming Test | corr. R² | 0.001 | 0.166 | -0.005 | -0.038 | -0.013 |
| p-value | 0.321 | 0.018 | 0.360 | 0.909 | 0.428 |
| Beta | -0.195 | -0.444 | -0.180 | 0.023 | 0.156 |
| MMSE | corr. R² | -0.027 | -0.029 | -0.03 | -0.004 | -0.033 |
| p-value | 0.598 | 0.632 | 0.645 | 0.353 | 0.702 |
| Beta | 0.104 | 0.097 | -0.091 | 0.182 | 0.076 |
| Word List – Total | corr. R² | -0.04 | 0.06 | -0.014 | -0.029 | -0.042 |
| p-value | 0.837 | 0.120 | 0.423 | 0.592 | 0.962 |
| Beta | 0.042 | -0.313 | -0.164 | 0.110 | 0.010 |
| Figures – Copy | corr. R² | -0.02 | 0.238 | -0.029 | -0.037 | -0.006 |
| p-value | 0.478 | 0.007 | 0.594 | 0.757 | 0.366 |
| Beta | -0.145 | -0.519 | -0.109 | 0.064 | -0.185 |
| Word List – Delayed Recall | corr. R² | 0.04 | 0.093 | -0.041 | -0.027 | -0.032 |
| p-value | 0.165 | 0.072 | 0.931 | 0.564 | 0.635 |
| Beta | 0.280 | -0.359 | 0.018 | 0.119 | -0.098 |
| Word List – Recognition | corr. R² | -0.035 | 0.309 | -0.015 | -0.041 | -0.041 |
| p-value | 0.697 | 0.002 | 0.438 | 0.915 | 0.873 |
| Beta | 0.080 | -0.581 | -0.159 | -0.022 | -0.033 |
| Figures – Recall | corr. R² | 0.017 | 0.018 | -0.042 | -0.01 | -0.041 |
| p-value | 0.241 | 0.239 | 0.976 | 0.396 | 0.918 |
| Beta | 0.238 | -0.239 | -0.006 | 0.174 | -0.021 |
| Clock drawing | corr. R² | -0.005 | 0.187 | -0.048 | 0.102 | 0.09 |
| p-value | 0.355 | 0.029 | 0.775 | 0.086 | 0.100 |
| Beta | -0.212 | -0.477 | 0.066 | -0.383 | 0.369 |
| CERAD-total score | corr. R² | -0.041 | 0.102 | 0.09 | -0.031 | -0.008 |
| p-value | 0.873 | 0.062 | 0.075 | 0.630 | 0.381 |
| Beta | 0.033 | -0.371 | -0.355 | 0.099 | -0.179 |

**Abbreviations:** MMSE, Mini-Mental State examination; CERAD-NAB, Consortium to Establish a Registry for Alzheimer`s Disease Neuropsychological Assessment Battery.

**Supplementary figures**

**Supplementary Figure 1: Consort Flow Diagram.**

Excluded (n= 74)

AChE-I not taken (n=43)

Declined to participate (n=31)

Assessed for eligibility

(n=150)

Included (n=76)

Donepezil (n=48)

daily dose 5 mg (n=6)

daily dose 10mg (n=41)

daily dose 15mg (n=1)

Rivastigmine (n=28)

daily dose 4,6mg/24h (n=2)

daily dose 9,5mg/24h (n=26)

Patients who were prescribed an AChE-I at a baseline who presented for a routine follow-up appointment were informed about the study and asked to provide written informed consent if they met the inclusion criteria, ie having mild to moderate Alzheimer’s dementia and being on a stable dosage of the AChE-I that was prescribed at baseline. The attending doctor was free in his choice which AChE-I to prescribe as this was not part of this study. For a detailed description of the inclusion and exclusion criteria, please refer to Methods – Patient recruitment and study design in the manuscript.

**Abbreviations:** AChE-I, acetylcholinesterase inhibitor; n, number; mg, milligram; h, hours

**Supplementary Figure 2: Boxplots showing the distribution of donepezil serum concentrations.**

**
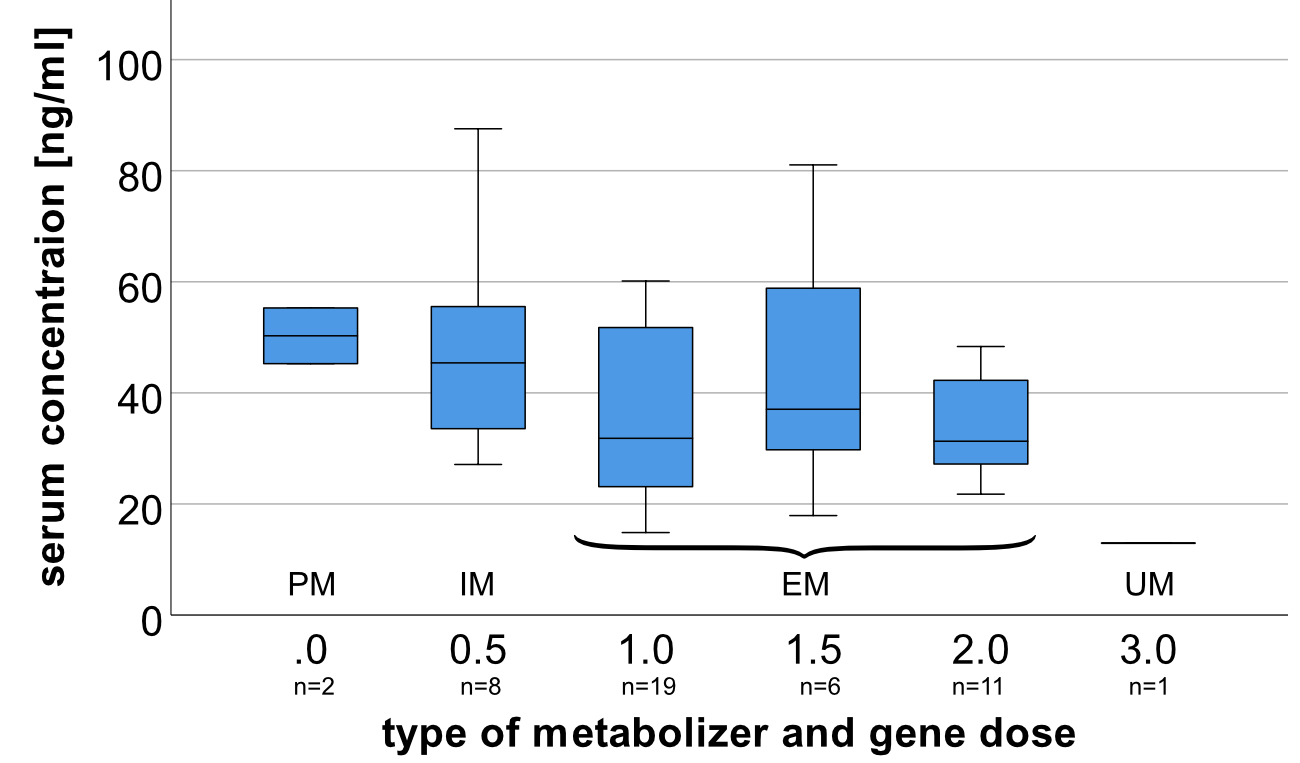
**

**Notes:** donepezil serum concentrations for the respective type of metabolizer and gene dose.

**Abbreviations:** ng/ml, nanograms per milliliter.
